# Supplementary material for: A proteomic screen of Ty1 integrase partners identifies the protein kinase CK2 as a regulator of Ty1 retrotransposition
Source: PubMed Central journal article supplement (PMC9673352; doi:10.1186/s13100-022-00284-0), 2022-11-18
Supplement: 13100_2022_284_MOESM6_ESM.pdf [file 13100_2022_284_MOESM6_ESM.pdf]

## Supplementary Table S5 - Yeast Strains used in this study

| Strain code        | Name                                                                                                                          | Genotype                                                                                                                                         | Origin                             |
|--------------------|-------------------------------------------------------------------------------------------------------------------------------|--------------------------------------------------------------------------------------------------------------------------------------------------|------------------------------------|
| yABA19             | WT                                                                                                                            | MATa <i>his3Δ1 leu2Δ0 met15Δ0 ura3Δ0 trp1Δ::NatMX</i>                                                                                            | This study                         |
| yABA21             | <i>cka2Δ ckb2Δ</i>                                                                                                            | MATa <i>his3Δ1 leu2Δ0 met15Δ0 ura3Δ0 trp1Δ::NatMX cka2Δ::HphMX ckb2Δ::KanMX</i>                                                                  | This study <sup>d,g</sup>          |
| LV1434             | WT                                                                                                                            | MATα Ty1- <i>his3AI-Δ1-3114 his3-Δ1 leu2-Δ0 lys2-Δ0 ura3Δ0</i>                                                                                   | (1)                                |
| yABA15             | Ty1- <i>his3AI cka1Δ</i>                                                                                                      | MATα Ty1- <i>his3AI-Δ1-3114 his3-Δ1 leu2-Δ0 lys2-Δ0 ura3Δ0 cka1Δ::KanMX</i>                                                                      | This study <sup>a</sup>            |
| yABA16             | Ty1- <i>his3AI cka2Δ</i>                                                                                                      | MATα Ty1- <i>his3AI-Δ1-3114 his3-Δ1 leu2-Δ0 lys2-Δ0 ura3Δ0 cka2Δ::KanMX</i>                                                                      | This study <sup>b</sup>            |
| yABA17             | Ty1- <i>his3AI ckb1Δ</i>                                                                                                      | MATα Ty1- <i>his3AI-Δ1-3114 his3-Δ1 leu2-Δ0 lys2-Δ0 ura3Δ0 ckb1Δ::KanMX</i>                                                                      | This study <sup>c</sup>            |
| yABA18             | Ty1- <i>his3AI ckb2Δ</i>                                                                                                      | MATα Ty1- <i>his3AI-Δ1-3114 his3-Δ1 leu2-Δ0 lys2-Δ0 ura3Δ0 ckb2Δ::KanMX</i>                                                                      | This study <sup>d</sup>            |
| yABA24             | Ty1- <i>his3AI cka1Δ ckb1Δ</i>                                                                                                | MATα Ty1- <i>his3AI-Δ1-3114 his3-Δ1 leu2-Δ0 lys2-Δ0 ura3Δ0 cka1Δ::KanMX ckb1Δ::HphMX</i>                                                         | This study <sup>a,e</sup>          |
| yABA25             | Ty1- <i>his3AI cka1Δ ckb2Δ</i>                                                                                                | MATα Ty1- <i>his3AI-Δ1-3114 his3-Δ1 leu2-Δ0 lys2-Δ0 ura3Δ0 cka2Δ::KanMX ckb2Δ::HphMX</i>                                                         | This study <sup>b,f</sup>          |
| yABA26             | Ty1- <i>his3AI cka2Δ ckb1Δ</i>                                                                                                | MATα Ty1- <i>his3AI-Δ1-3114 his3-Δ1 leu2-Δ0 lys2-Δ0 ura3Δ0 cka2Δ::HphMX ckb1Δ::KanMX</i>                                                         | This study <sup>c,g</sup>          |
| yABA27             | Ty1- <i>his3AI ckb2Δ ckb1Δ</i>                                                                                                | MATα Ty1- <i>his3AI-Δ1-3114 his3-Δ1 leu2-Δ0 lys2-Δ0 ura3Δ0 ckb2Δ::KanMX ckb1Δ::HphMX</i>                                                         | This study <sup>d,e</sup>          |
| yABA28             | Ty1- <i>his3AI cka2Δ ckb2Δ</i>                                                                                                | MATα Ty1- <i>his3AI-Δ1-3114 his3-Δ1 leu2-Δ0 lys2-Δ0 ura3Δ0 cka2Δ::HphMX ckb2Δ::KanMX</i>                                                         | This study <sup>d,g</sup>          |
| BY4741             | WT                                                                                                                            | MATa <i>his3Δ1 leu2Δ0 met15Δ0 ura3Δ0</i>                                                                                                         | Euroscarf                          |
| yABA11             | <i>cka2Δ ckb2Δ</i>                                                                                                            | MATa <i>his3Δ1 leu2Δ0 met15Δ0 ura3Δ0 cka2Δ::HphMX ckb2Δ::KanMX</i>                                                                               | This study <sup>d,g</sup>          |
| yABA35             | <i>ste12Δ</i>                                                                                                                 | MATa <i>his3Δ1 leu2Δ0 met15Δ0 ura3Δ0 ste12Δ::LEU2</i>                                                                                            | This study                         |
| yABA37             | <i>ste12Δ cka2Δ ckb2Δ</i>                                                                                                     | MATa <i>his3Δ1 leu2Δ0 met15Δ0 ura3Δ0 cka2Δ::HphMX ckb2Δ::KanMX ste12Δ::LEU2</i>                                                                  | This study <sup>d,g,h</sup>        |
| LV1757             | Ty1- <i>his3AI spt3Δ</i>                                                                                                      | MATα Ty1- <i>his3AI-Δ1-3114 his3-Δ1 leu2-Δ0 lys2-Δ0 ura3Δ0 spt3Δ::HphMX</i>                                                                      | (2)                                |
| LV47               | <i>spt3-101</i>                                                                                                               | MATα <i>ura3Δ851 trp1Δ63 his3Δ200 spt3-101</i>                                                                                                   |                                    |
| ByΔste12           | <i>ste12Δ</i>                                                                                                                 | MATalpha <i>his3Δ1 leu2Δ0 trp1Δ met15Δ0 ste12Δ::URA3</i>                                                                                         | This study                         |
| dCKΔste12          | <i>ste12Δ cka2Δ ckb2Δ</i>                                                                                                     | MATalpha <i>his3Δ1 leu2Δ0 trp1Δ met15Δ0 ste12Δ::URA3 cka2Δ::HphMX ckb2Δ::KanMX</i>                                                               | This study <sup>d,g</sup>          |
| Y190               |                                                                                                                               | MATa, <i>ura3-52, his3-Δ200, lys2-801, ade2-101, trp1-901, leu2-3,112, gal4Δ, gal80Δ, URA3::GAL1-lacZ, LYS2::GAL4(UAS)-HIS3, cyh<sup>R</sup></i> | (3)                                |
| TAP-tagged strains | SC1131 (TAP-Cka1)<br>SC6163 (TAP-Cka2)<br>SC1987 (TAP-Ckb1)<br>SC1485 (TAP-Ckb2)<br>SC1870 (TAP-Tup1)<br>SC5005 (TAP-YKR011C) |                                                                                                                                                  | Yeast TAP-tagged library, Cellzome |

a. *CKA1* complete CDS was deleted by a KanMX cassette amplified from the gDNA of strain BY4741

*cka1Δ::KanMX* from Euroscarf strain collection clone Id:Y01428

b. *CKA2* complete CDS was deleted by a KanMX cassette amplified from the gDNA of BY4741

*cka2Δ::KanMX* from Euroscarf strain collection clone Id:Y01837

c. *CKB1* complete CDS was deleted by a KanMX cassette amplified from the gDNA of BY4741

*ckb1Δ::KanMX* from Euroscarf strain collection clone Id: Y04387

d. *CKB2* complete CDS was deleted by a KanMX cassette amplified from the gDNA of BY4741

*ckb1Δ::KanMX* from Euroscarf strain collection clone Id: Y01815

e. *CKB1* complete CDS was deleted by a HphMX cassette amplified from pAG32.

f. *CKB2* complete CDS was deleted by a HphMX cassette amplified from pAG32.

g. *CKA2* complete CDS was deleted by a HphMX cassette amplified from pAG32.

### **Supplementary Table S6 - Plasmids used in this study**

| Name                                  | Description                                                                                                                                                                                                                                                                                                                 | Origin     |
|---------------------------------------|-----------------------------------------------------------------------------------------------------------------------------------------------------------------------------------------------------------------------------------------------------------------------------------------------------------------------------|------------|
| pAG32                                 | for deletion                                                                                                                                                                                                                                                                                                                | (4)        |
| pRS305                                | for deletion                                                                                                                                                                                                                                                                                                                |            |
| pFA6a-HphMX6                          | for deletion                                                                                                                                                                                                                                                                                                                | (5)        |
| pGAL-Ty1                              | 2 $\mu$ <i>AmpR URA3 pGAL1-Ty1-his3AI</i>                                                                                                                                                                                                                                                                                   | (6)        |
| pABA19                                | CEN <i>AmpR LEU2 pPSP2-Ty1-his3AI</i>                                                                                                                                                                                                                                                                                       | J. Curcio  |
| pABA20                                | CEN <i>AmpR URA3 pPSP2-Ty1-his3AI</i>                                                                                                                                                                                                                                                                                       | This study |
| pPSP2-Ty1 <sup>M1</sup>               | CEN <i>AmpR URA3 pPSP2-Ty1<sup>M1</sup></i> (IN mutations S <sub>469A</sub> , S <sub>471A</sub> , Y <sub>472F</sub> , S <sub>473A</sub> , T <sub>477A</sub> , T <sub>480A</sub> , S <sub>499A</sub> )                                                                                                                       | This study |
| pPSP2-Ty1 <sup>M3</sup>               | CEN <i>AmpR URA3 pPSP2-Ty1<sup>M3</sup>.his3AI</i> (IN mutations S <sub>347A</sub> , S <sub>354A</sub> , S <sub>360A</sub> , S <sub>411A</sub> , S <sub>469A</sub> , S <sub>471A</sub> , Y <sub>472F</sub> , S <sub>473A</sub> , T <sub>477A</sub> , T <sub>480A</sub> , S <sub>499A</sub> )                                | This study |
| pPSP2-Ty1 <sup>M6</sup>               | CEN <i>AmpR URA3 pPSP2-Ty1<sup>M6</sup>.his3AI</i> (IN mutations S <sub>43A</sub> , S <sub>347A</sub> , S <sub>354A</sub> , S <sub>360A</sub> , S <sub>411A</sub> , S <sub>469A</sub> , S <sub>471A</sub> , Y <sub>472F</sub> , S <sub>473A</sub> , T <sub>477A</sub> , T <sub>480A</sub> , S <sub>499A</sub> )             | This study |
| pCM185-IN-HBH                         | CEN <i>AmpR TRP1 TetO<sub>7</sub>-CYC1p</i> -IN-HBH                                                                                                                                                                                                                                                                         | (7)        |
| pCM185-IN                             | CEN <i>AmpR TRP1 TetO<sub>7</sub>-CYC1p</i> -IN                                                                                                                                                                                                                                                                             | This study |
| pCM185-IN <sup>M6</sup>               | CEN <i>AmpR TRP1 TetO<sub>7</sub>-CYC1p</i> -IN <sup>M6</sup> (IN mutations S <sub>43A</sub> , S <sub>347A</sub> , S <sub>354A</sub> , S <sub>360A</sub> , S <sub>411A</sub> , S <sub>469A</sub> , S <sub>471A</sub> , Y <sub>472F</sub> , S <sub>473A</sub> , T <sub>477A</sub> , T <sub>480A</sub> , S <sub>499A</sub> )  | This study |
| pCM185-Ty1                            | CEN <i>AmpR TRP1 TetO<sub>7</sub>-CYC1p</i> -Ty1                                                                                                                                                                                                                                                                            | This study |
| pCM185-Ty1 <sup>M6</sup>              | CEN <i>AmpR TRP1 TetO<sub>7</sub>-CYC1p</i> -Ty1 <sup>M6</sup> (IN mutations S <sub>43A</sub> , S <sub>347A</sub> , S <sub>354A</sub> , S <sub>360A</sub> , S <sub>411A</sub> , S <sub>469A</sub> , S <sub>471A</sub> , Y <sub>472F</sub> , S <sub>473A</sub> , T <sub>477A</sub> , T <sub>480A</sub> , S <sub>499A</sub> ) | This study |
| pAS2-IN-C-tag                         | 2 $\mu$ <i>AmpR TRP1</i> GBD-IN-C-tag                                                                                                                                                                                                                                                                                       | This study |
| pAS2-Cka1                             | 2 $\mu$ <i>AmpR TRP1</i> GBD-Cka1                                                                                                                                                                                                                                                                                           | This study |
| pAS2-Cka2                             | 2 $\mu$ <i>AmpR TRP1</i> GBD-Cka2                                                                                                                                                                                                                                                                                           | This study |
| pAS2-Ckb1                             | 2 $\mu$ <i>AmpR TRP1</i> GBD-Ckb1                                                                                                                                                                                                                                                                                           | This study |
| pAS2-Ckb2                             | 2 $\mu$ <i>AmpR TRP1</i> GBD-Ckb2                                                                                                                                                                                                                                                                                           | This study |
| pACTII-IN-C-tag                       | 2 $\mu$ <i>AmpR LEU2</i> GAD-IN-C-tag                                                                                                                                                                                                                                                                                       | This study |
| pPL121/pACTII-IN                      | 2 $\mu$ <i>AmpR LEU2</i> GAD-IN                                                                                                                                                                                                                                                                                             | (8)        |
| pAT26/ pACTII-IN <sup>578</sup>       | 2 $\mu$ <i>AmpR LEU2</i> GAD-IN <sup>578</sup>                                                                                                                                                                                                                                                                              | (8)        |
| pABA10/ pACTII-IN <sup>386-511</sup>  | 2 $\mu$ <i>AmpR LEU2</i> GAD-IN <sup>386-511</sup>                                                                                                                                                                                                                                                                          | This study |
| pACTII-Cka1                           | 2 $\mu$ <i>AmpR LEU2</i> GAD-Cka1                                                                                                                                                                                                                                                                                           | This study |
| pACTII-Cka2                           | 2 $\mu$ <i>AmpR LEU2</i> GAD-Cka2                                                                                                                                                                                                                                                                                           | This study |
| pACTII-Ckb1                           | 2 $\mu$ <i>AmpR LEU2</i> GAD-Ckb1                                                                                                                                                                                                                                                                                           | This study |
| pACTII-Ckb2                           | 2 $\mu$ <i>AmpR LEU2</i> GAD-Ckb2                                                                                                                                                                                                                                                                                           | This study |
| pET17b-6H-Fh8-IN-C-tag                | pBR322 <i>AmpR T7p</i> -6his-Fh8-IN optimized codon-C-tag                                                                                                                                                                                                                                                                   | (2)        |
| pET17b-6H-Fh8-IN <sub>c</sub> -C-tag  | pBR322 <i>AmpR T7p</i> -6his-Fh8-IN <sup>578-635</sup> optimized codon-C-tag                                                                                                                                                                                                                                                | This study |
| pET17b-6H-Fh8-IN <sup>M1</sup> -C-tag | pBR322 <i>AmpR T7p</i> -6his-Fh8IN <sup>M1</sup> optimized codon-C-tag (IN mutations S <sub>469A</sub> , S <sub>471A</sub> , Y <sub>472F</sub> , S <sub>473A</sub> , T <sub>477A</sub> , T <sub>480A</sub> , S <sub>499A</sub> )                                                                                            | This study |
| pET17b-6H-Fh8-IN <sup>M2</sup> -C-tag | pBR322 <i>AmpR T7p</i> -6his-Fh8IN <sup>M2</sup> optimized codon-C-tag (IN mutations S <sub>43A</sub> , S <sub>347A</sub> , S <sub>354A</sub> , S <sub>360A</sub> )                                                                                                                                                         | This study |
| pET17b-6H-Fh8-IN <sup>M3</sup> -C-tag | pBR322 <i>AmpR T7p</i> -6his-Fh8IN <sup>M3</sup> optimized codon-C-tag (IN mutations S <sub>347A</sub> , S <sub>354A</sub> , S <sub>360A</sub> , S <sub>411A</sub> , S <sub>469A</sub> , S <sub>471A</sub> , Y <sub>472F</sub> , S <sub>473A</sub> , T <sub>477A</sub> , T <sub>480A</sub> , S <sub>499A</sub> )            | This study |
| pET17b-6H-Fh8-IN <sup>M4</sup> -C-tag | pBR322 <i>AmpR T7p</i> -6his-Fh8IN <sup>M4</sup> optimized codon-C-tag (IN mutations S <sub>43A</sub> , S <sub>347A</sub> , S <sub>354A</sub> , S <sub>360A</sub> , S <sub>469A</sub> , S <sub>471A</sub> , S <sub>473A</sub> )                                                                                             | This study |

|                                        |                                                                                                                                                                                                                                                                                                                                            |            |
|----------------------------------------|--------------------------------------------------------------------------------------------------------------------------------------------------------------------------------------------------------------------------------------------------------------------------------------------------------------------------------------------|------------|
| pET17b-6H-Fh8-IN <sup>M5</sup> -C-tag  | pBR322 <i>AmpR</i> <i>T7p</i> -6his-Fh8IN <sup>M5</sup> optimized codon-C-tag (IN mutations S <sub>43</sub> A, S <sub>347</sub> A, S <sub>354</sub> A, S <sub>360</sub> A, S <sub>469</sub> A, S <sub>471</sub> A, S <sub>473</sub> A, S <sub>499</sub> A)                                                                                 | This study |
| pET17b-6H-Fh8-IN <sup>M6</sup> -C-tag  | pBR322 <i>AmpR</i> <i>T7p</i> -6his-Fh8IN <sup>M6</sup> optimized codon-C-tag (IN mutations S <sub>43</sub> A, S <sub>347</sub> A, S <sub>354</sub> A, S <sub>360</sub> A, S <sub>411</sub> A, S <sub>469</sub> A, S <sub>471</sub> A, Y <sub>472</sub> F, S <sub>473</sub> A, T <sub>477</sub> A, T <sub>480</sub> A, S <sub>499</sub> A) | This study |
| pET17b-6H-Sso7dIN-C-tag                | pBR322 <i>AmpR</i> <i>T7p</i> -6his-Sso7d-IN optimized codon-C-tag optimized codon-C-tag                                                                                                                                                                                                                                                   | (2)        |
| pET17b-6H-Sso7dIN <sup>M5</sup> -C-tag | pBR322 <i>AmpR</i> <i>T7p</i> -6his-Sso7d IN <sup>M5D</sup> optimized codon-C-tag (IN mutations S <sub>43</sub> D, S <sub>347</sub> D, S <sub>354</sub> D, S <sub>360</sub> D, S <sub>469</sub> D, S <sub>471</sub> D, S <sub>473</sub> D, S <sub>499</sub> D)                                                                             | This study |

pAB19 is a derivative of pBJC1280 given by Joan Curcio (CEN *AmpR* *LEU2* p*PSP2*-Ty1-*his3AI*) in which *LEU2* has been replaced by *URA3*.

### **Supplementary Table S7 - Primers used in this study**

| Name                                     | Sequence                                              |
|------------------------------------------|-------------------------------------------------------|
| O-AB18_Act1F                             | TCGTGCTGTCTTCCCATC                                    |
| O-AB19_Act1R                             | AAACGGCTTGGATGGAACCG                                  |
| O-AB46_TYBOUT                            | GTGATGACAAAACCTCTTCCG                                 |
| O-AB91_SNR33OUT                          | TTTTAGAGTGACACCATCGTAC                                |
| O-ABA27_HXT (HXT17, HXT16, HXT15, HXT13) | GACATGGGCCCTGTTGCT TATATTGT                           |
| O-AMA14_Ty1-5'2F                         | TGGAACGCCTCTGAGCACTC                                  |
| O-AMA15_Ty1-5'2R                         | CATTAGGTGAGGTTAACATTG                                 |
| O-AMA34-HIS3-5R                          | GGCGCAAATCCTGATCCAAA                                  |
| O-AMA35- HIS3-5F                         | ACGACCATCACACCACTGAA                                  |
| O-AMA10_Act1F                            | ACGTTACCCAATTGAACACG                                  |
| O-AMA11_Act1R                            | AGAACAGGGTGTCTTCTGG                                   |
| O-AMA158_Adapteur F                      | GTAATACGACTCACTATAGGGCACGCGTGGTTCGACGGCCC<br>GGGCTGGT |
| O-AMA159_Adapteur R                      | ACCAGCCC                                              |
| O-AMA344_PSP2-5F                         | AGCTTGACTCACCAGCTCTT                                  |
| O-AMA345_PSP2-3R                         | TATCGTCGCCACCTTTCTCA                                  |

1. Mou Z, Kenny AE, Curcio MJ. Hos2 and Set3 promote integration of Ty1 retrotransposons at tRNA genes in *Saccharomyces cerevisiae*. *Genetics*. 2006;172(4):2157-67.
2. Nguyen PQ, Conesa C, Rabut E, Bragagnolo G, Gouzerh C, Fernandez-Tornero C, et al. Ty1 integrase is composed of an active N-terminal domain and a large disordered C-terminal module dispensable for its activity in vitro. *J Biol Chem*. 2021:101093.
3. Harper JW, Adami GR, Wei N, Keyomarsi K, Elledge SJ. The p21 Cdk-interacting protein Cip1 is a potent inhibitor of G1 cyclin-dependent kinases. *Cell*. 1993;75(4):805-16.

4. Goldstein AL, McCusker JH. Three new dominant drug resistance cassettes for gene disruption in *Saccharomyces cerevisiae*. *Yeast*. 1999;15(14):1541-53.
5. Hentges P, Van Driessche B, Tafforeau L, Vandenhoute J, Carr AM. Three novel antibiotic marker cassettes for gene disruption and marker switching in *Schizosaccharomyces pombe*. *Yeast*. 2005;22(13):1013-9.
6. Curcio MJ, Garfinkel DJ. Single-step selection for Ty1 element retrotransposition. *Proc Natl Acad Sci U S A*. 1991;88(3):936-40.
7. Asif-Laidin A, Conesa C, Bonnet A, Grison C, Adhya I, Menouni R, et al. A small targeting domain in Ty1 integrase is sufficient to direct retrotransposon integration upstream of tRNA genes. *EMBO J*. 2020;39(17):e104337.
8. Bridier-Nahmias A, Tchalikian-Cosson A, Baller JA, Menouni R, Fayol H, Flores A, et al. Retrotransposons. An RNA polymerase III subunit determines sites of retrotransposon integration. *Science*. 2015;348(6234):585-8.
